# Supplementary material for: Spatiotemporal gait characteristics in patients with COPD during the Gait Real-time Analysis Interactive Lab-based 6-minute walk test
Source: PLOS journal article supplement (doi:10.1371/journal.pone.0190099), 2017-12-28
Supplement: S5 (10.1371/journal.pone.0190099.s005) [file journal.pone.0190099.s005]

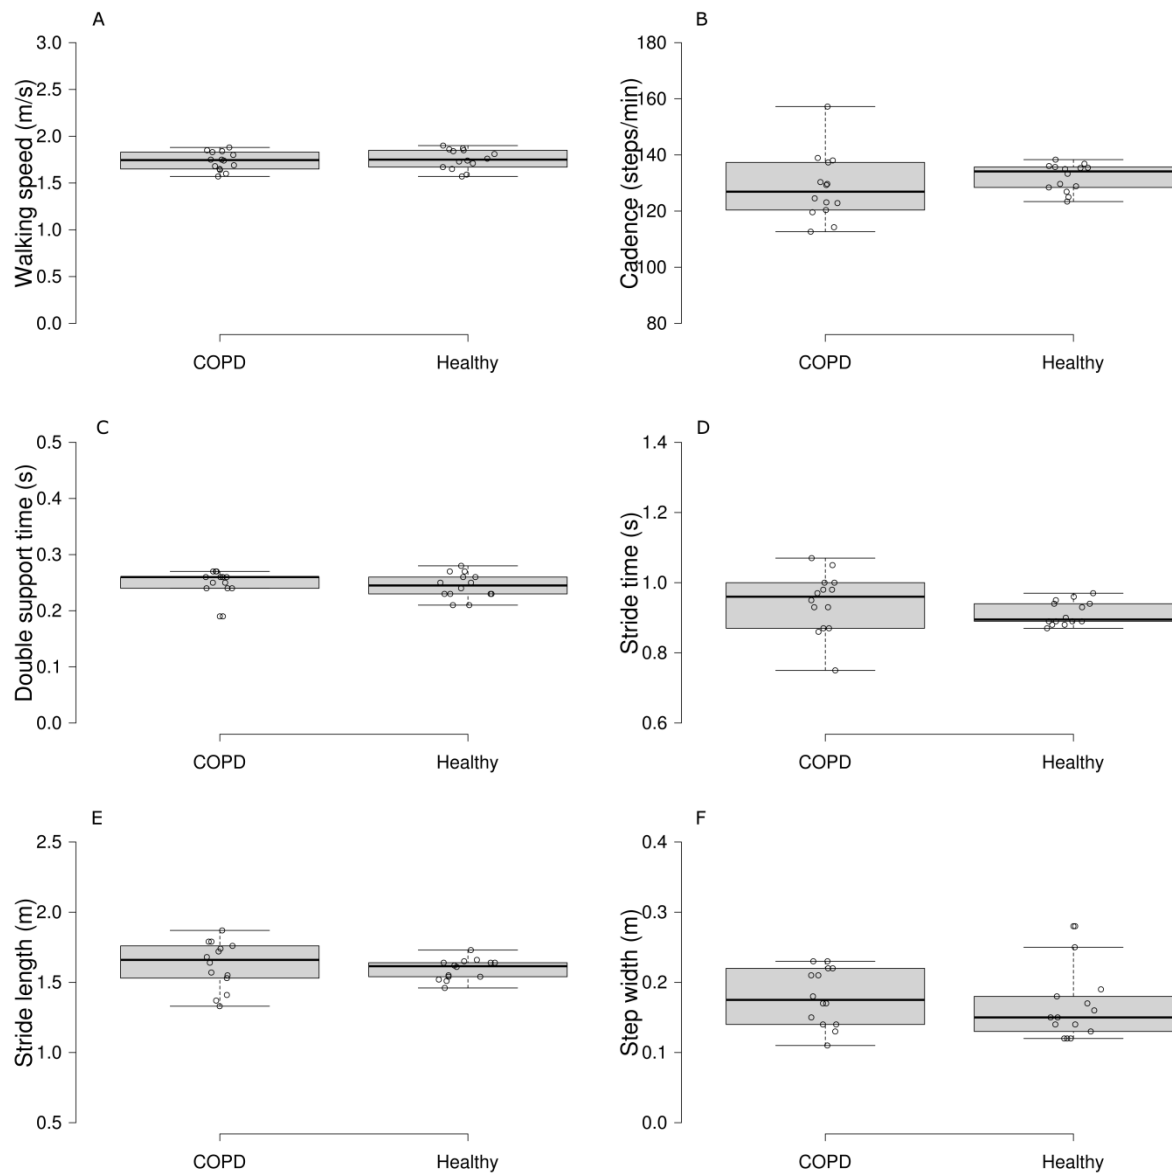

**Figure A. Boxplots of spatiotemporal gait characteristics in the sub-analysis.** Patients with COPD (n=14) and healthy elderly (n=14) are depicted. Centre lines show the medians; box limits indicate the 25th and 75th percentiles; whiskers extend 1.5 times the interquartile range from the 25th and 75th percentiles, outliers are represented by dots.

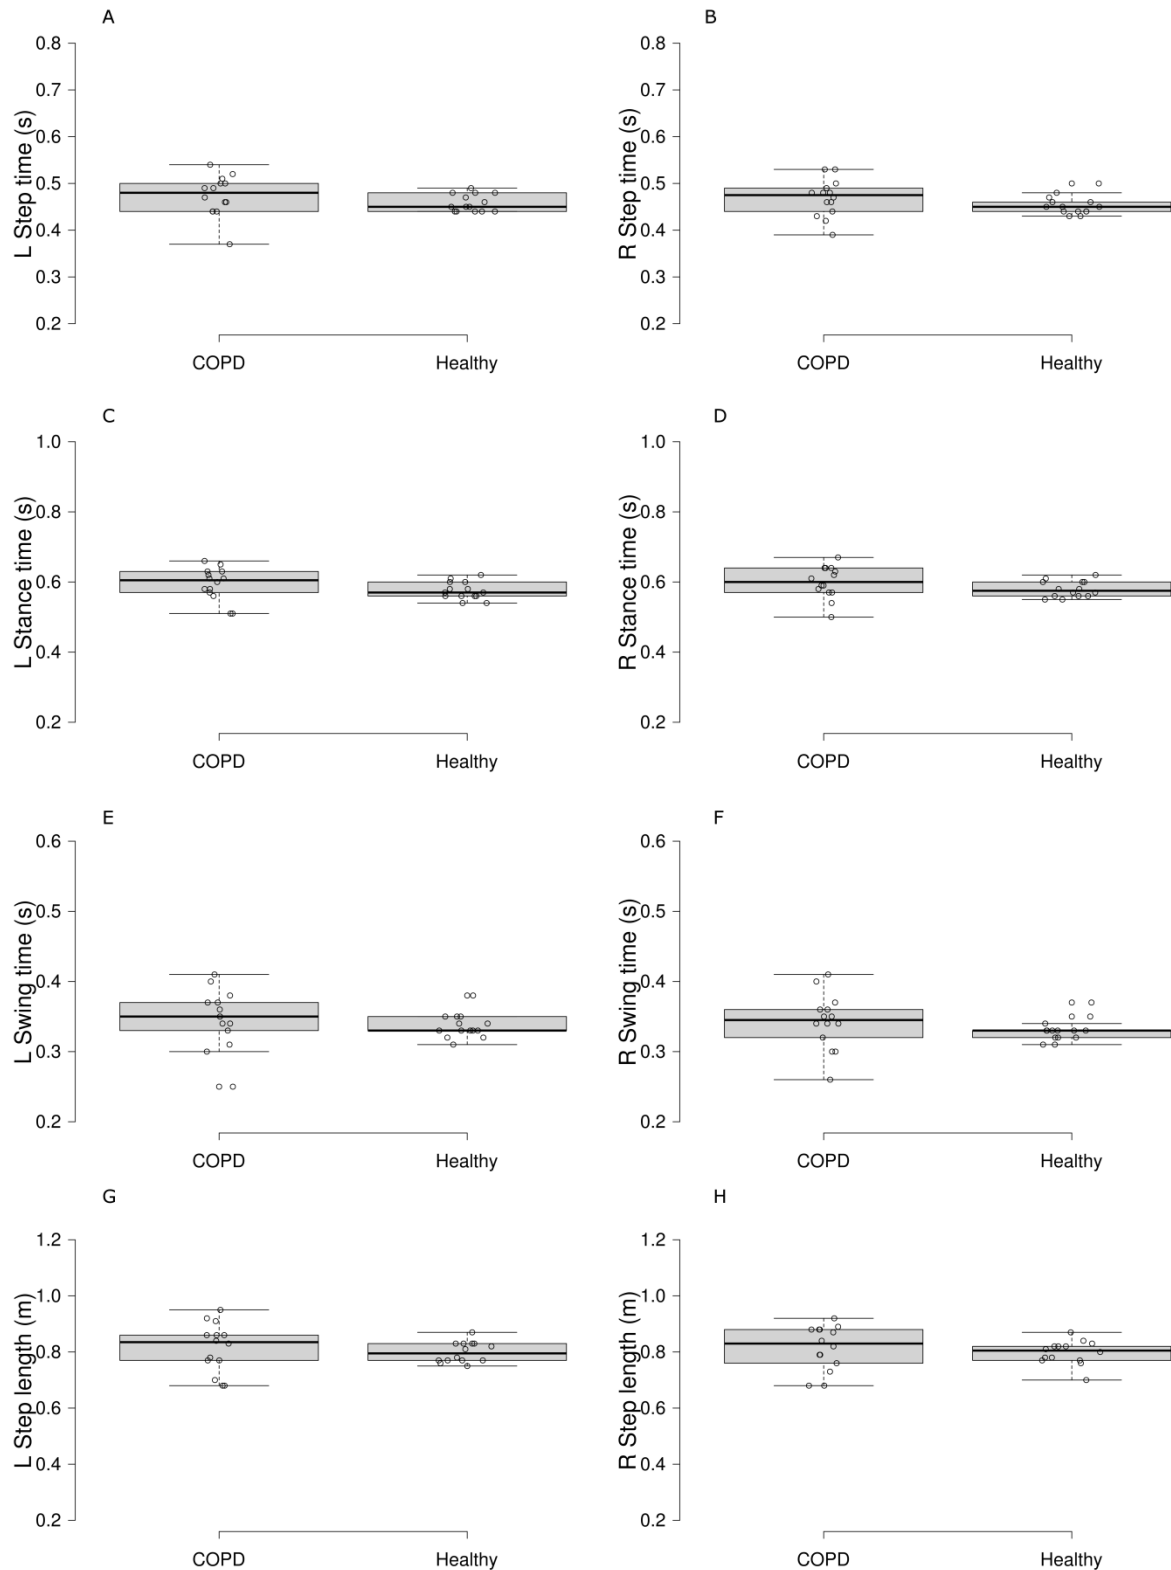

**Figure B. Boxplots of spatiotemporal gait characteristics separated for left and right side in the sub-analysis.** Patients with COPD (n=14) and healthy elderly (n=14) are depicted. Centre lines show the medians; box limits indicate the 25th and 75th percentiles; whiskers extend 1.5 times the interquartile range from the 25th and 75th percentiles, outliers are represented by dots.
